# Supplementary material for: Distinct Transcriptome Expression of the Temporal Cortex of the Primate Microcebus murinus during Brain Aging versus Alzheimer's Disease-Like Pathology
Source: PLoS One. 2010 Sep 16;5(9):e12770. doi: 10.1371/journal.pone.0012770 (PMC2940844; doi:10.1371/journal.pone.0012770)
Supplement: Table S1 — Genes sorted by anova (0.05 MB XLS) [file pone.0012770.s001.xls]

## Sheet: Feuil1
Table S1: Genes sorted by ANOVA (p<0,01)
Genes with significant expression changes identified by Anova when data from the cortex samples of young, healthy aged and “AD-like” (AD) were compared.
Blue: genes that have been already sorted as regulated by age (see Table 2);
Red: genes already identified as regulated by AD (Table 3);
Purple: genes regulated by age and by AD (Table 2 and 3).
Probesets	Gene Symbol	Young Group Mean	Young Group SD	Old Group mean	Old Group SD	AD Group Mean	AD Group SD	p value
1558450_at	A2M	177.83333	20.798237	132.6	23.348566	96.5	6.363961	4.633248E-4
1562275_at	ADAMTS9	67.5	31.399044	44.0	26.051231	135.5	10.606602	0.002095983
201012_at	ANXA1	51.666668	20.33388	87.9	38.379536	154.5	16.263456	0.0046052383
211935_at	ARL6IP	277.33334	68.50012	398.4	94.302345	504.5	61.51829	0.008354647
226861_at	ASB8	67.166664	19.630758	70.2	39.57777	175.0	24.04163	0.0026681083
1554177_a_at	ATP5S	36.5	26.311594	26.3	19.044102	90.0	2.828427	0.005433112
233182_x_at	ATXN3	62.833332	45.98007	43.0	25.328947	138.0	4.2426405	0.0074108574
1557799_at	C11orf31	78.833336	41.595272	80.6	34.16366	185.0	62.225395	0.009805797
213246_at	C14orf109	102.166664	23.953428	146.0	40.016663	216.5	67.17515	0.0067528537
226406_at	C18orf25	348.66666	111.636314	375.7	51.82674	570.5	21.920311	0.008441996
1559716_at	C18orf37	143.33333	44.356133	128.3	44.2243	250.5	28.991379	0.0086446535
218089_at	C20orf4	174.33333	80.18395	268.0	28.126698	139.5	79.90307	0.0044224113
234654_at	C20orf4	54.5	13.003846	59.2	26.540537	140.5	14.849242	6.372195E-4
230251_at	C6orf176	50.0	14.615061	56.6	17.608078	9.5	4.9497476	0.0065820413
219552_at	C9orf13	36.166668	12.797135	17.2	12.865111	61.5	6.363961	7.270352E-4
222960_at	CACNA1H	278.33334	51.744244	136.5	47.775517	153.5	65.76093	2.4328106E-4
200757_s_at	CALU	368.83334	34.678043	505.2	88.66641	344.0	7.071068	0.0028148538
213108_at	CAMK2A	1126.3334	386.37787	1596.5	252.5181	968.0	36.769554	0.008044736
205297_s_at	CD79B	123.833336	53.165466	85.1	20.024708	187.0	11.313708	0.00420138
205830_at	CLGN	72.0	20.38627	39.7	30.915836	124.5	24.748737	0.0029122967
211287_x_at	CSF2RA	107.333336	42.06503	93.4	17.199482	26.0	19.79899	0.009952965
226888_at	CSNK1G1	334.83334	33.582237	452.4	69.60396	350.5	38.890873	0.0033454394
241016_at	CUL3	44.666668	30.375427	22.1	20.256413	129.0	83.4386	0.0022584035
1558742_at	DEXI	56.666668	18.991226	48.6	21.427916	108.0	11.313708	0.0061400533
218021_at	DHRS4	218.5	32.831387	146.2	33.369316	239.5	37.476658	7.107773E-4
208956_x_at	DUT	84.5	29.262604	84.3	41.72143	196.5	6.363961	0.0035914546
217270_s_at	DYRK1B	223.66667	52.822975	110.2	57.89991	110.0	111.72287	0.0077927397
223427_s_at	EPB41L4B	91.833336	13.105979	62.7	16.49276	73.5	17.67767	0.008808391
205231_s_at	EPM2A	36.166668	21.451496	35.5	19.732939	101.0	11.313708	0.0020954262
205061_s_at	EXOSC9	113.5	41.161877	200.2	38.9695	173.5	79.90307	0.005728304
1558964_at	FAT3	78.333336	44.193512	54.5	33.012623	177.5	81.31728	0.006315927
215404_x_at	FGFR1	61.0	35.276054	87.3	24.75233	175.0	25.455845	8.281194E-4
236808_at	FGFR1OP2	22.5	18.769655	34.7	19.714912	85.5	24.748737	0.005062742
224768_at	FLJ10006	279.5	55.160675	323.9	64.25548	465.5	33.23402	0.006169297
219501_at	FLJ10094	301.33334	58.42146	303.1	49.753727	461.5	16.263456	0.0033741386
230076_at	FLJ10156	644.8333	149.5024	947.7	122.94629	707.5	62.932503	0.0011020846
237914_s_at	FLJ10707	53.5	44.221035	29.5	18.20409	110.5	0.70710677	0.008393643
219392_x_at	FLJ11029	588.6667	120.13936	802.2	123.198845	448.0	93.3381	0.0014052974
225888_at	FLJ13089	147.66667	28.458157	178.0	45.360287	270.0	7.071068	0.0056814463
212995_x_at	FLJ14346	273.0	50.179676	379.6	74.08734	257.0	48.08326	0.009855225
219846_at	FLJ20203	62.5	32.84966	64.9	22.43732	135.0	0.0	0.007957746
58994_at	FLJ20241	346.0	84.6853	250.9	51.42081	180.0	2.828427	0.0079013305
65635_at	FLJ21865	703.3333	103.23694	541.6	72.225266	493.0	59.39697	0.0032137458
1553626_a_at	FLJ40342	45.833332	17.197868	36.4	21.649736	114.0	67.88225	0.005987212
212824_at	FUBP3	81.5	13.17194	60.6	36.999096	145.0	28.284271	0.009439913
1552943_at	GABRG1	46.166668	23.086071	27.6	17.373032	87.0	16.970562	0.003967057
226701_at	GJA5	20.5	24.072805	24.5	15.226074	89.0	26.870058	0.0015580204
222432_s_at	GK001	231.0	104.93046	194.4	48.111446	515.5	50.204582	1.6030356E-4
203159_at	GLS	276.66666	80.68375	385.3	68.546906	451.5	26.16295	0.009707613
225672_at	GOLGA2	333.33334	67.52678	318.4	43.33641	169.0	84.85281	0.0072591268
225058_at	GPR108	532.1667	102.9027	493.8	113.18206	222.0	97.580734	0.009906111
242517_at	GPR54	64.5	30.018328	62.8	26.40202	171.5	77.07464	0.0023430937
210939_s_at	GRM1	161.83333	24.003471	103.5	31.422745	143.0	39.59798	0.0055596116
209945_s_at	GSK3B	914.3333	304.43237	1308.8	223.87686	664.5	294.86353	0.005125454
203138_at	HAT1	133.33333	49.677628	156.0	28.79043	286.0	57.982758	8.787723E-4
222540_s_at	HBXAP	678.0	139.17903	936.4	127.25757	736.5	64.34672	0.003953853
207721_x_at	HINT1	1705.1666	734.46674	2698.6	370.4844	1926.0	789.13116	0.008966995
224415_s_at	HINT2	1032.1666	222.66156	1515.2	306.44766	990.0	55.154327	0.0057311165
213470_s_at	HNRPH1	811.8333	180.8197	534.2	116.26292	558.5	116.67262	0.005412502
35201_at	HNRPL	2281.6667	682.1905	3058.8	298.95438	1894.5	178.89801	0.0032778517
208815_x_at	HSPA4	197.83333	55.09779	151.8	48.3639	293.5	23.334524	0.0063148835
209292_at	ID4	67.0	37.191395	66.1	14.99222	139.5	47.376156	0.009959441
1556579_s_at	IGSF10	53.166668	25.341007	73.3	30.1074	165.5	62.932503	0.002260319
201627_s_at	INSIG1	157.33333	41.49056	137.7	26.1621	247.5	3.535534	0.001596535
41387_r_at	JMJD3	177.5	45.676033	107.3	43.238487	190.5	31.819805	0.009631672
223208_at	KCTD10	141.66667	35.296837	76.2	36.690296	215.5	2.1213202	1.8238653E-4
215672_s_at	KIAA0828	384.33334	46.970913	223.1	72.57709	232.0	181.01933	0.00355999
204568_at	KIAA0831	77.666664	34.857807	137.9	48.843174	35.0	1.4142135	0.007799282
213478_at	KIAA1026	190.16667	48.569195	311.9	65.037506	212.0	77.781746	0.0040075574
219371_s_at	KLF2	451.0	134.28328	284.3	80.66398	223.5	68.589355	0.009698354
211762_s_at	KPNA2	92.5	49.391296	48.2	31.442366	158.0	11.313708	0.004203915
204009_s_at	KRAS	2032.3334	306.24738	2809.8	493.09204	2123.5	277.89297	0.0072090058
1566513_a_at	LOC200169	75.5	27.790285	83.8	11.895844	141.0	35.35534	0.004535954
227325_at	LOC255783	141.5	51.231827	185.4	48.60544	36.5	2.1213202	0.003608558
228935_at	LOC283400	92.0	22.054478	101.7	21.556387	19.5	10.606602	6.088736E-4
1556842_at	LOC286087	53.833332	23.112045	21.8	12.452576	11.5	13.435029	0.003639095
232965_at	LOC400684	36.0	21.881498	72.8	19.809088	98.5	10.606602	0.0019338385
240566_at	LOC440033	20.833334	12.750163	47.0	15.606267	21.5	14.849242	0.00716831
239753_at	LOC441383	44.666668	26.257698	51.8	32.13098	137.0	48.08326	0.0073643937
225509_at	LOC56757	164.0	17.320509	132.6	39.110104	249.5	23.334524	0.0011124354
213346_at	LOC93081	109.333336	55.279896	202.3	50.35	166.5	6.363961	0.009916823
200785_s_at	LRP1	178.33333	67.74855	122.1	30.311165	254.5	4.9497476	0.0040489025
223492_s_at	LRRFIP1	298.16666	21.311186	219.8	50.721024	225.5	4.9497476	0.0068317708
209449_at	LSM2	318.33334	97.68862	460.8	74.94265	275.0	97.580734	0.0056252205
217922_at	MAN1A2	195.83333	50.272923	156.7	48.184948	329.0	135.7645	0.0064155194
202670_at	MAP2K1	332.16666	84.55393	529.3	98.95684	401.5	86.97414	0.0032345564
218372_at	MED9	92.166664	34.020092	73.9	40.605007	179.5	0.70710677	0.008079289
229302_at	MGC33926	341.33334	57.172256	497.9	62.244053	438.0	24.04163	4.7375003E-4
202959_at	MUT	53.666668	23.303791	47.2	19.35516	107.0	16.970562	0.0068724286
222153_at	MYEF2	45.166668	25.24612	26.1	22.057755	111.0	4.2426405	7.7921106E-4
203215_s_at	MYO6	51.666668	36.86552	123.8	37.732388	63.5	74.246216	0.00971656
204528_s_at	NAP1L1	99.5	28.076681	91.4	29.658052	214.0	9.899495	1.8475925E-4
201227_s_at	NDUFB8	2116.3333	743.0471	3495.8	578.24	2545.5	156.2706	0.002006958
211584_s_at	NPAT	37.166668	19.114567	56.8	27.73205	116.5	41.7193	0.008113655
232520_s_at	NSFL1C	1374.0	303.55493	2031.3	355.4156	1648.0	98.99495	0.0049655885
228128_x_at	PAPPA	42.166668	38.860863	48.4	28.972017	140.0	41.01219	0.0068574687
203845_at	PCAF	239.33333	69.038155	270.0	39.305077	463.0	158.39192	0.0023646592
226326_at	PCGF5	410.33334	104.433075	570.7	127.159615	739.5	57.27565	0.0071459273
211302_s_at	PDE4B	262.66666	107.991974	114.8	62.055176	56.0	60.811184	0.003996094
218319_at	PELI1	278.33334	88.52269	286.7	70.63372	525.5	126.57211	0.004724496
240829_at	PEX3	48.333332	17.84003	19.3	12.065102	14.5	7.7781744	0.002569302
241801_at	PGAP1	51.0	8.579044	43.4	12.8944435	86.5	9.192389	7.9720205E-4
240039_at	PLA2R1	70.0	16.504545	44.9	24.79897	113.0	4.2426405	0.002465376
217848_s_at	PP	792.6667	162.8013	1340.8	301.3539	1060.5	72.832	0.0027969603
203355_s_at	PSD3	149.5	71.25377	224.4	61.25575	332.0	32.526913	0.008345372
201532_at	PSMA3	457.33334	248.47105	686.1	90.54214	892.5	30.405592	0.007871926
235484_at	PTAR1	100.333336	28.535358	61.0	22.617594	114.5	16.263456	0.0067422236
212015_x_at	PTBP1	226.0	53.1639	174.8	60.591164	331.0	32.526913	0.008257599
240990_at	RAB5A	23.5	15.909117	19.6	19.207638	73.5	13.435029	0.0048049414
211960_s_at	RAB7	45.666668	21.416504	26.9	18.278402	83.5	7.7781744	0.0044098417
242073_at	RALBP1	34.5	22.277792	41.9	16.387327	96.0	12.727922	0.0029246602
232112_at	RALGPS2	89.166664	11.444067	78.4	26.357372	146.0	26.870058	0.005556874
212028_at	RBM25	630.6667	220.38028	952.3	183.05255	610.5	4.9497476	0.009061544
209868_s_at	RBMS1	224.16667	75.684654	175.4	31.591843	70.5	13.435029	0.006691201
238281_at	RBMS1	34.0	15.646086	42.0	24.280766	99.0	18.384777	0.0062631713
226404_at	RNPC2	185.66667	56.205574	171.5	27.540878	315.0	69.29646	0.0021701483
200029_at	RPL19	1420.0	469.92636	2401.9	527.5925	1523.0	800.4449	0.006433397
218830_at	RPL26L1	752.1667	307.37173	1197.8	184.63466	948.5	116.67262	0.0065655564
219762_s_at	RPL36	429.0	126.0492	793.8	230.39087	422.0	137.17871	0.004816731
226131_s_at	RPS16	1520.3334	545.5224	2417.0	457.57986	1805.0	298.39905	0.007799958
211487_x_at	RPS17	1011.1667	308.47195	1718.8	386.22183	830.0	260.2153	0.0015862271
214003_x_at	RPS20	573.1667	144.09221	946.0	221.1244	592.0	79.19596	0.0038900417
200834_s_at	RPS21	1635.0	509.21585	2691.2	550.1793	1589.5	215.66757	0.0023130737
242625_at	RSAD2	43.833332	33.247055	20.1	14.161372	87.5	4.9497476	0.0036426273
1554089_s_at	SBDS	247.5	84.50739	179.4	76.77702	391.0	65.053825	0.00995941
218206_x_at	SCAND1	429.16666	74.40811	624.4	98.72881	413.5	71.417786	0.0011491382
242279_at	SDFR1	31.833334	25.103119	37.4	14.400617	96.0	19.79899	0.0024261568
216274_s_at	SEC11L1	264.0	52.019226	346.7	57.21315	403.5	34.64823	0.0084239235
205352_at	SERPINI1	1435.0	505.73392	2149.5	175.78665	2350.0	524.6732	0.0022253671
221768_at	SFPQ	595.6667	186.54187	359.6	85.61439	563.0	131.52187	0.008003936
226112_at	SGCB	68.0	29.529646	56.3	29.862835	160.0	11.313708	0.0012350236
1554692_at	SLC23A2	104.333336	42.495487	48.5	28.178991	146.5	33.23402	0.0020176906
225212_at	SLC25A25	78.333336	43.93025	124.1	29.580212	41.0	28.284271	0.009894653
226683_at	SNAG1	409.83334	44.732166	412.1	76.34927	617.5	4.9497476	0.0026084473
219888_at	SPAG4	201.66667	43.112255	194.6	41.250454	58.0	56.568542	0.0023113
1563674_at	SPAP1	33.5	24.849546	56.3	31.212711	160.0	39.59798	4.2672374E-4
1564066_at	SPATS1 /// LOC441151	248.33333	88.69649	98.0	58.704533	128.0	82.02438	0.0036249338
40420_at	STK10	119.0	18.686893	93.8	18.7071	150.0	1.4142135	0.002070601
214441_at	STX6	240.66667	52.644722	143.7	29.055695	160.5	28.991379	7.4605056E-4
202260_s_at	STXBP1	816.8333	81.5412	880.0	127.297554	1228.0	39.59798	0.0012343997
1558208_at	TARDBP	20.833334	15.715174	69.8	25.37628	60.5	16.263456	0.00226409
203887_s_at	THBD	45.833332	11.160944	46.1	18.4719	100.5	21.920311	0.0021721164
219580_s_at	TMC5	23.5	11.131038	38.2	23.522093	92.0	50.91169	0.009426373
223132_s_at	TRIM8	534.1667	64.545845	502.4	64.74772	288.5	113.84419	0.0018126597
222991_s_at	UBQLN1	425.5	50.599407	335.6	123.57921	684.0	101.82338	0.002035414
1555561_a_at	UGCGL2	34.833332	21.273615	23.8	13.062244	87.5	9.192389	5.1840005E-4
1561236_at	UXS1	43.166668	27.418364	16.2	14.412957	87.5	44.547726	0.0024214885
231976_at	WINS1	75.166664	16.154463	43.7	17.391249	88.0	14.142136	0.0017992501
204847_at	ZBTB11	219.16667	37.59477	293.6	57.76235	475.5	3.535534	5.8343765E-5
1552283_s_at	ZDHHC11	94.0	44.627346	30.0	19.725899	54.0	33.941124	0.004570403
202050_s_at	ZNF262	237.5	49.706135	159.5	40.5168	140.0	7.071068	0.005630604
229279_at	ZNF432	119.333336	51.184635	66.7	19.499573	148.0	55.154327	0.0089488
